# Supplementary material for: Assessing Mitochondrial DNA Variation and Copy Number in Lymphocytes of ~2,000 Sardinians Using Tailored Sequencing Analysis Tools
Source: PubMed Central journal article supplement (PMC4501845; doi:10.1371/journal.pgen.1005306), 2015-07-14

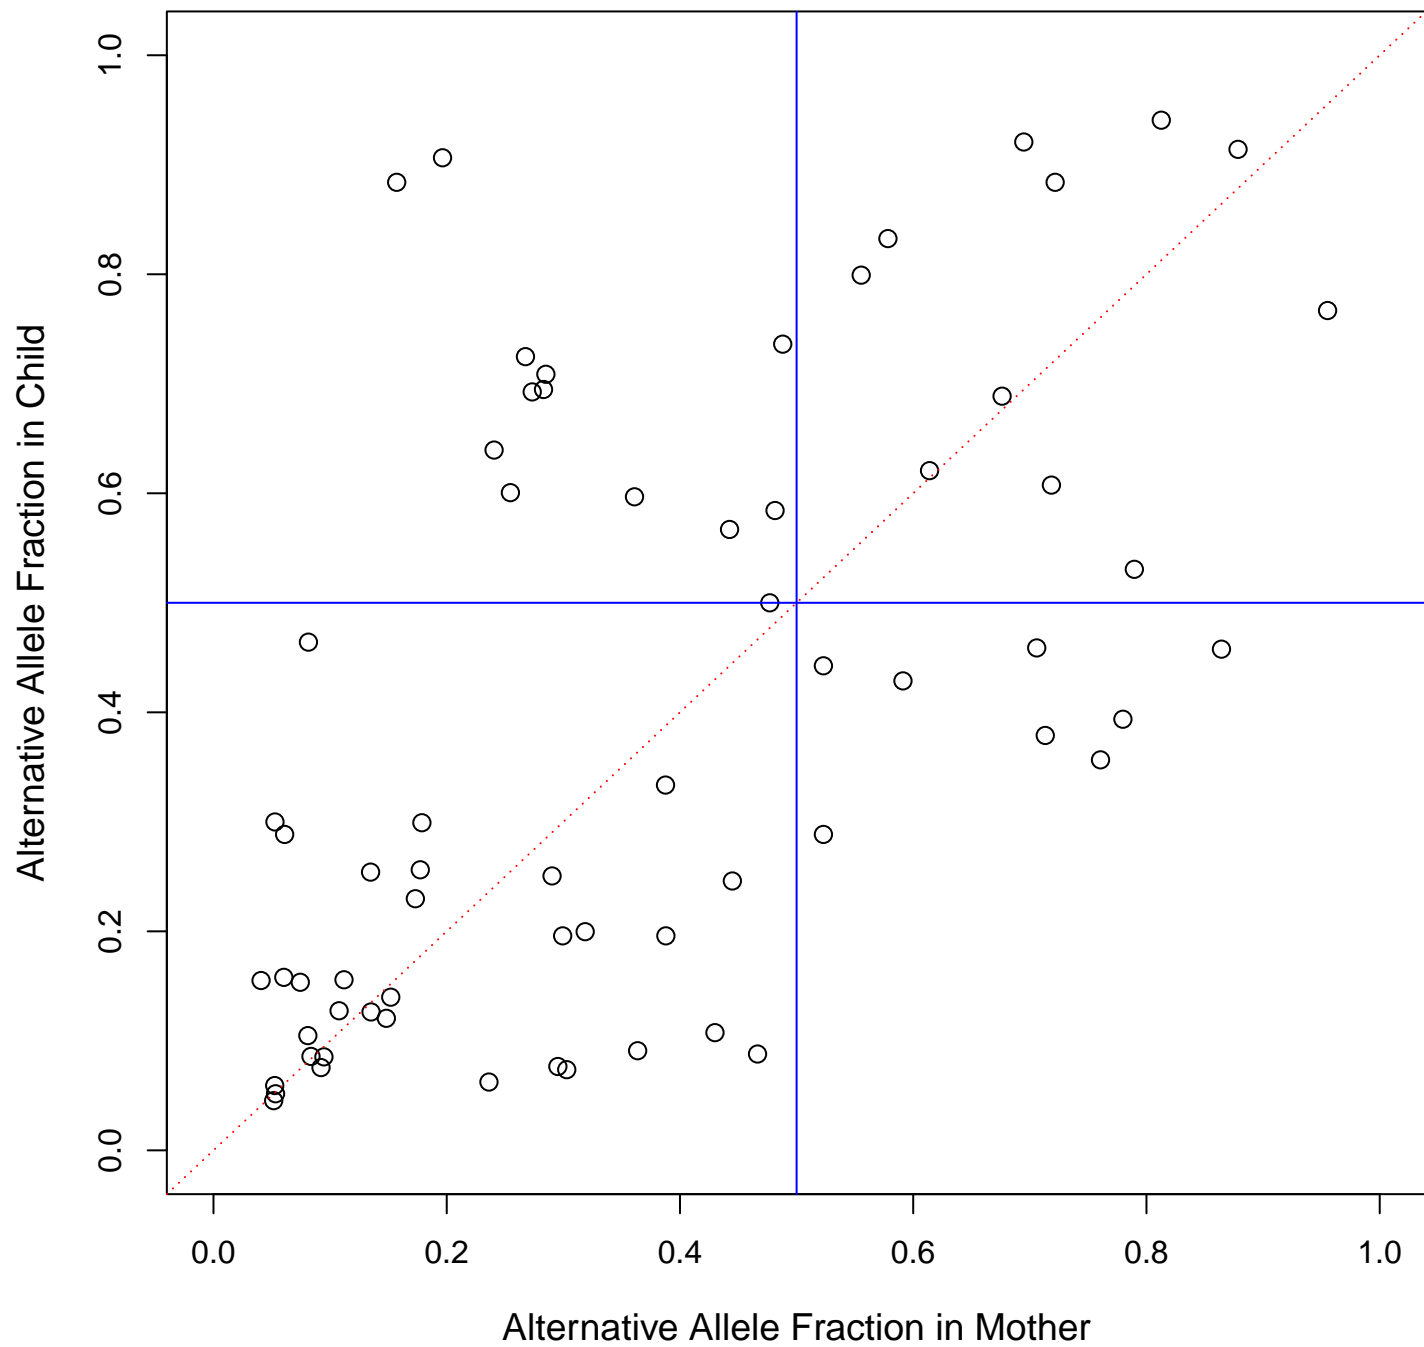

Supplement: pgen.1005306.s009.pdf [file pgen.1005306.s009.pdf]
